# Supplementary material for: Diagnosis ofNeisseria gonorrhoeaeUsing Molecular Beacon
Source: Hindawi journal article supplement (doi:10.1155/2015/597432), 2015-01-01
Supplement: f1 [file 597432.f1.pdf]

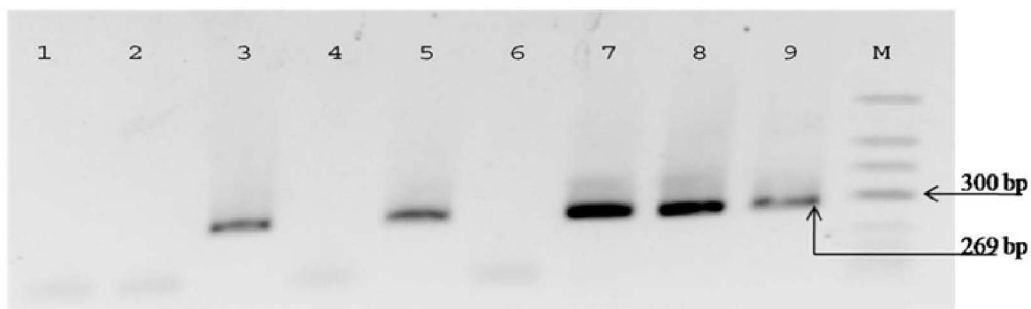

**Figure S1: Agarose gel (1.5%) detecting the infection load in clinical samples using in house PCR:** Amplicon of 269 bp (indicated by arrow) shows successful amplification of orf1 of *N. gonorrhoeae*. Lane 1 is No template control, lane 2-8 are clinical isolates and Lane 9 is positive template control.

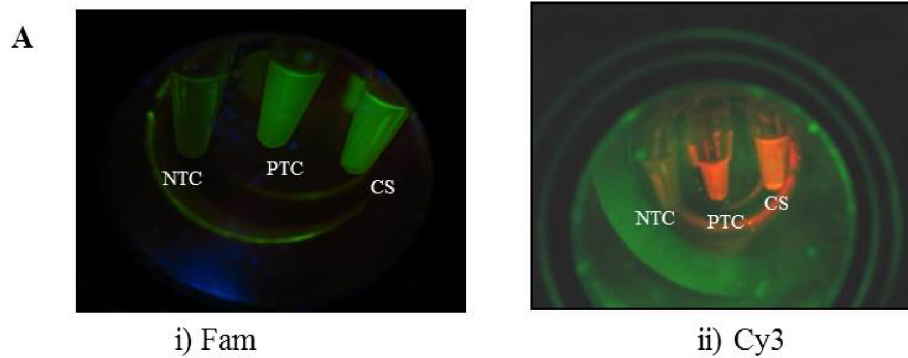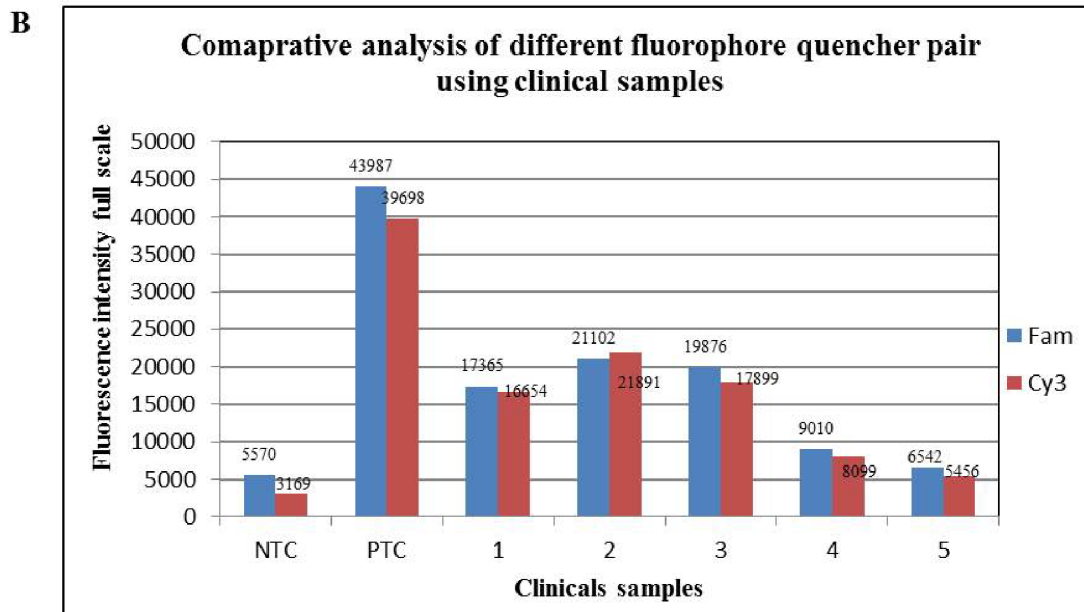

**Figure S2: Comparative analysis of use of different fluorophore - quencher pairs for molecular beacon for detection of *N. gonorrhoeae*.**

A) Direct visualization of PCR tube under dark different reader. NTC = No template control, PTC = Positive template control, CS = clinical sample.

B) Detection of different clinical samples in ELISA reader using different fluorophores.
